# Supplementary material for: Cell cycle-dependent phosphorylation regulates RECQL4 pathway choice and ubiquitination in DNA double-strand break repair
Source: PubMed Central journal article supplement (PMC5725494; doi:10.1038/s41467-017-02146-3), 2017-12-11

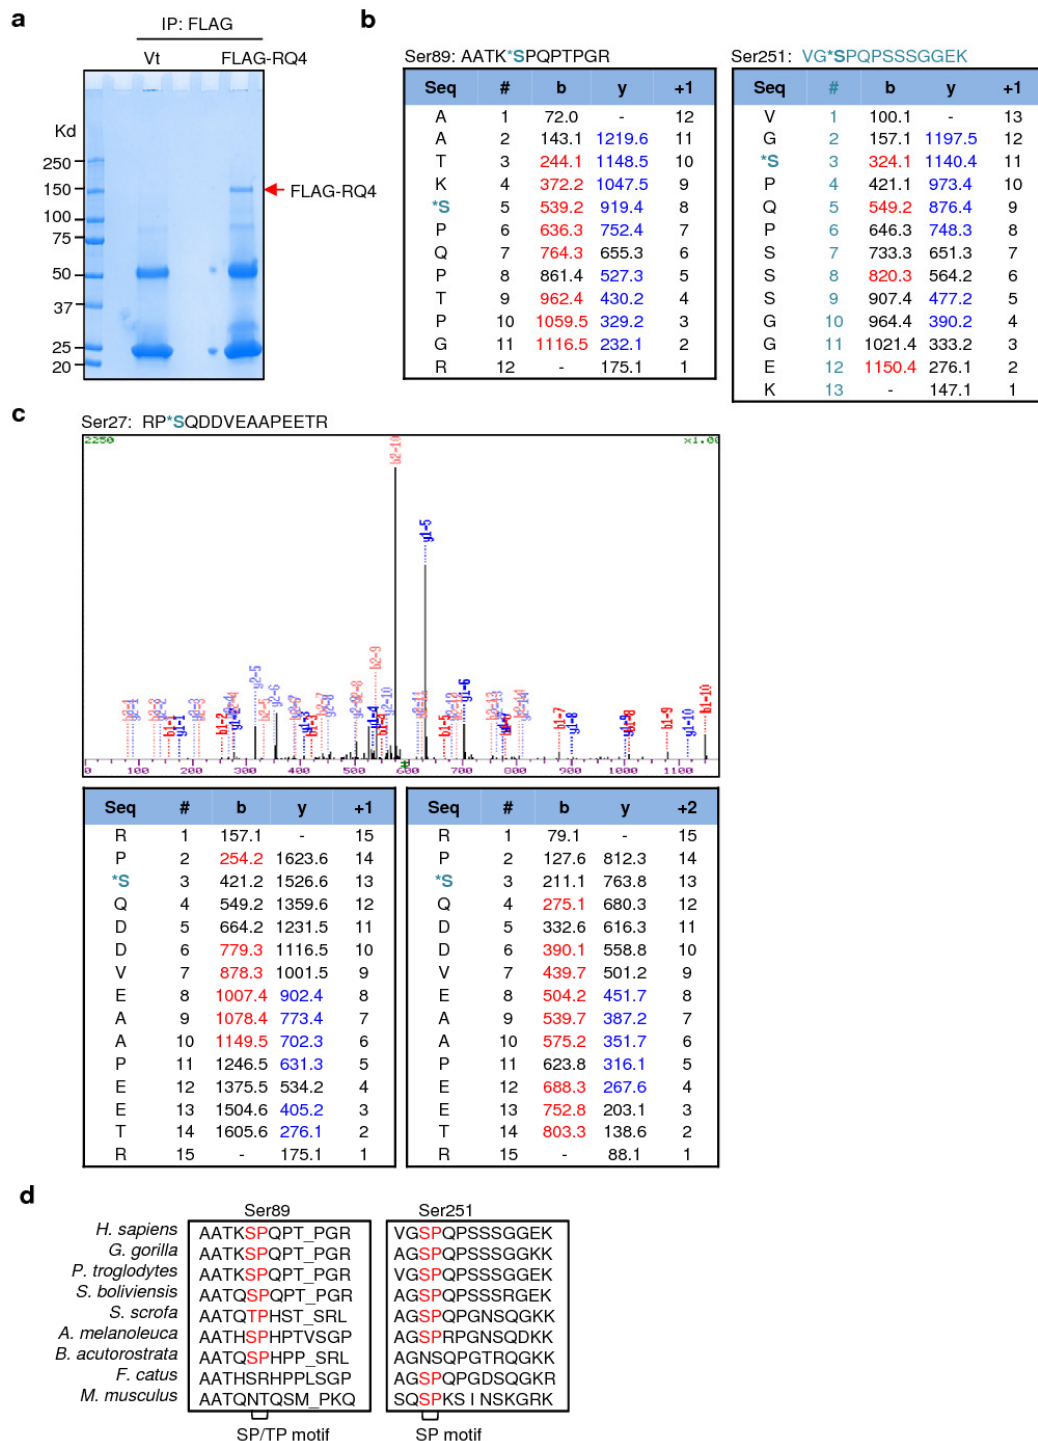

**Supplementary Figure 1** Identification of phosphorylation sites in RECQL4 by mass spectrometry. **(a)** Coomassie Blue staining of 3XFLAG-tagged RECQL4 immunoprecipitated from HEK293T cells. 3XFLAG-tagged RECQL4 was expressed in HEK293T cells and purified from denatured cell lysate with M2 FLAG beads. Immunoprecipitated proteins were separated with SDS-PAGE and visualized with Coomassie Blue staining. **(b)** Annotation of MS/MS spectra for identification of phosphorylation sites Ser89 and Ser251. **(c)** Annotation of MS/MS spectra for identification of phosphorylation sites Ser27. **(d)** Sequence alignment of human RECQL4 peptides containing Ser89 and Ser251 with homologs in other mammals. The sequences were obtained from KEGG, and analyzed with Cluster W with default parameters. *H. sapiens*, human; *G. gorilla*, gorilla; *P. troglodytes*, chimpanzee; *S.*

*boliviensis*, black-capped squirrel monkey; *S. scrofa*, wild boar; *A. melanoleuca*, giant panda; *B. acutorostrata*, minke whale; *F. catus*, domestic cat; *M. musculus*, mouse.

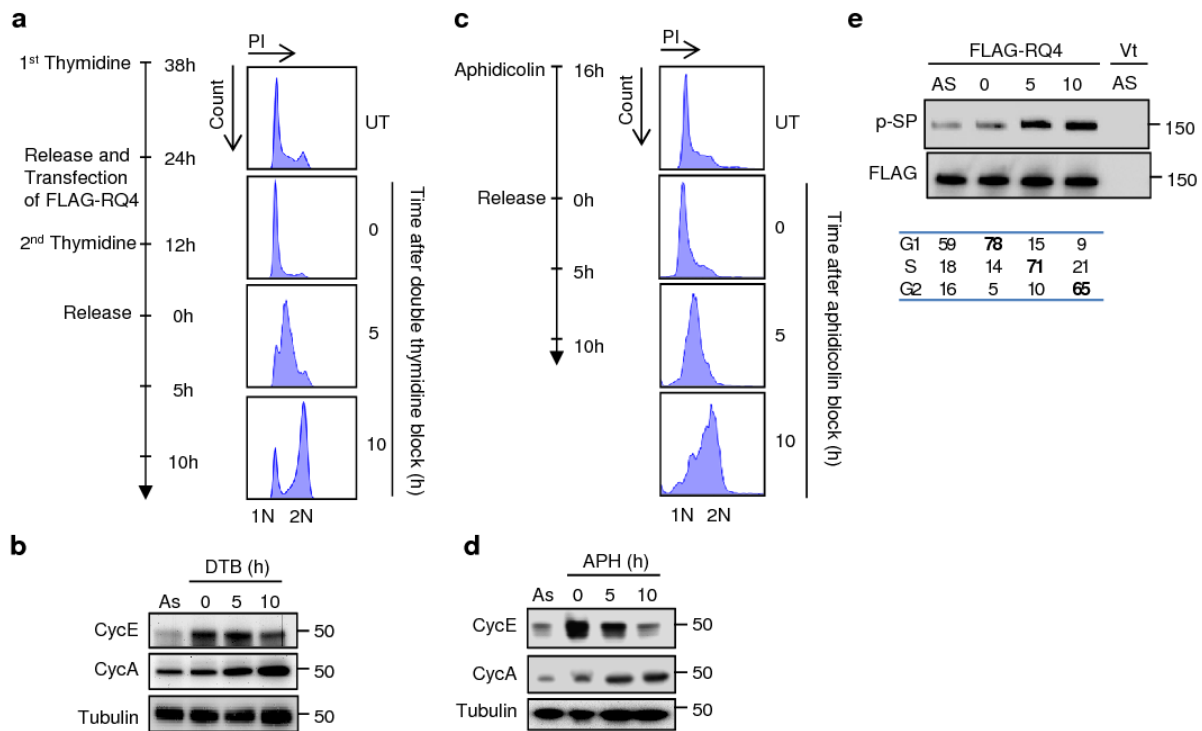

**Supplementary Figure 2** CDK-mediated phosphorylation of RECQL4 takes places in the S and G2 phases of the cell cycle. **(a)** Flow cytometry analysis of cell cycle distribution of U2OS cells by propidium iodide staining. Schematic diagram of cell cycle synchronization by double thymidine block in U2OS cells. **(b)** Expression level of Cyclin A and Cyclin E in synchronized U2OS cells. **(c)** Schematic diagram of cell cycle synchronization by aphidicolin treatment and flow cytometry analysis of cell cycle distribution of HEK293T cells by propidium iodide staining. **(d)** Western blots showing protein levels of Cyclin A and Cyclin E in aphidicolin-treated HEK293T cells. **(e)** Cell cycle-dependent phosphorylation of RECQL4 on SP sites in HEK293T cells. HEK293T cells were transfected with the plasmid expressing 3XFLAG-RECQL4 or vector, and the cell cycle progression was synchronized with aphidicolin as shown in Panel c and d. The percentage of cells in the different phases of the cell cycle is listed below. 3XFLAG-RECQL4 was immunoprecipitated and analyzed by Western blotting with anti-p-SP antibody and anti-FLAG antibody.

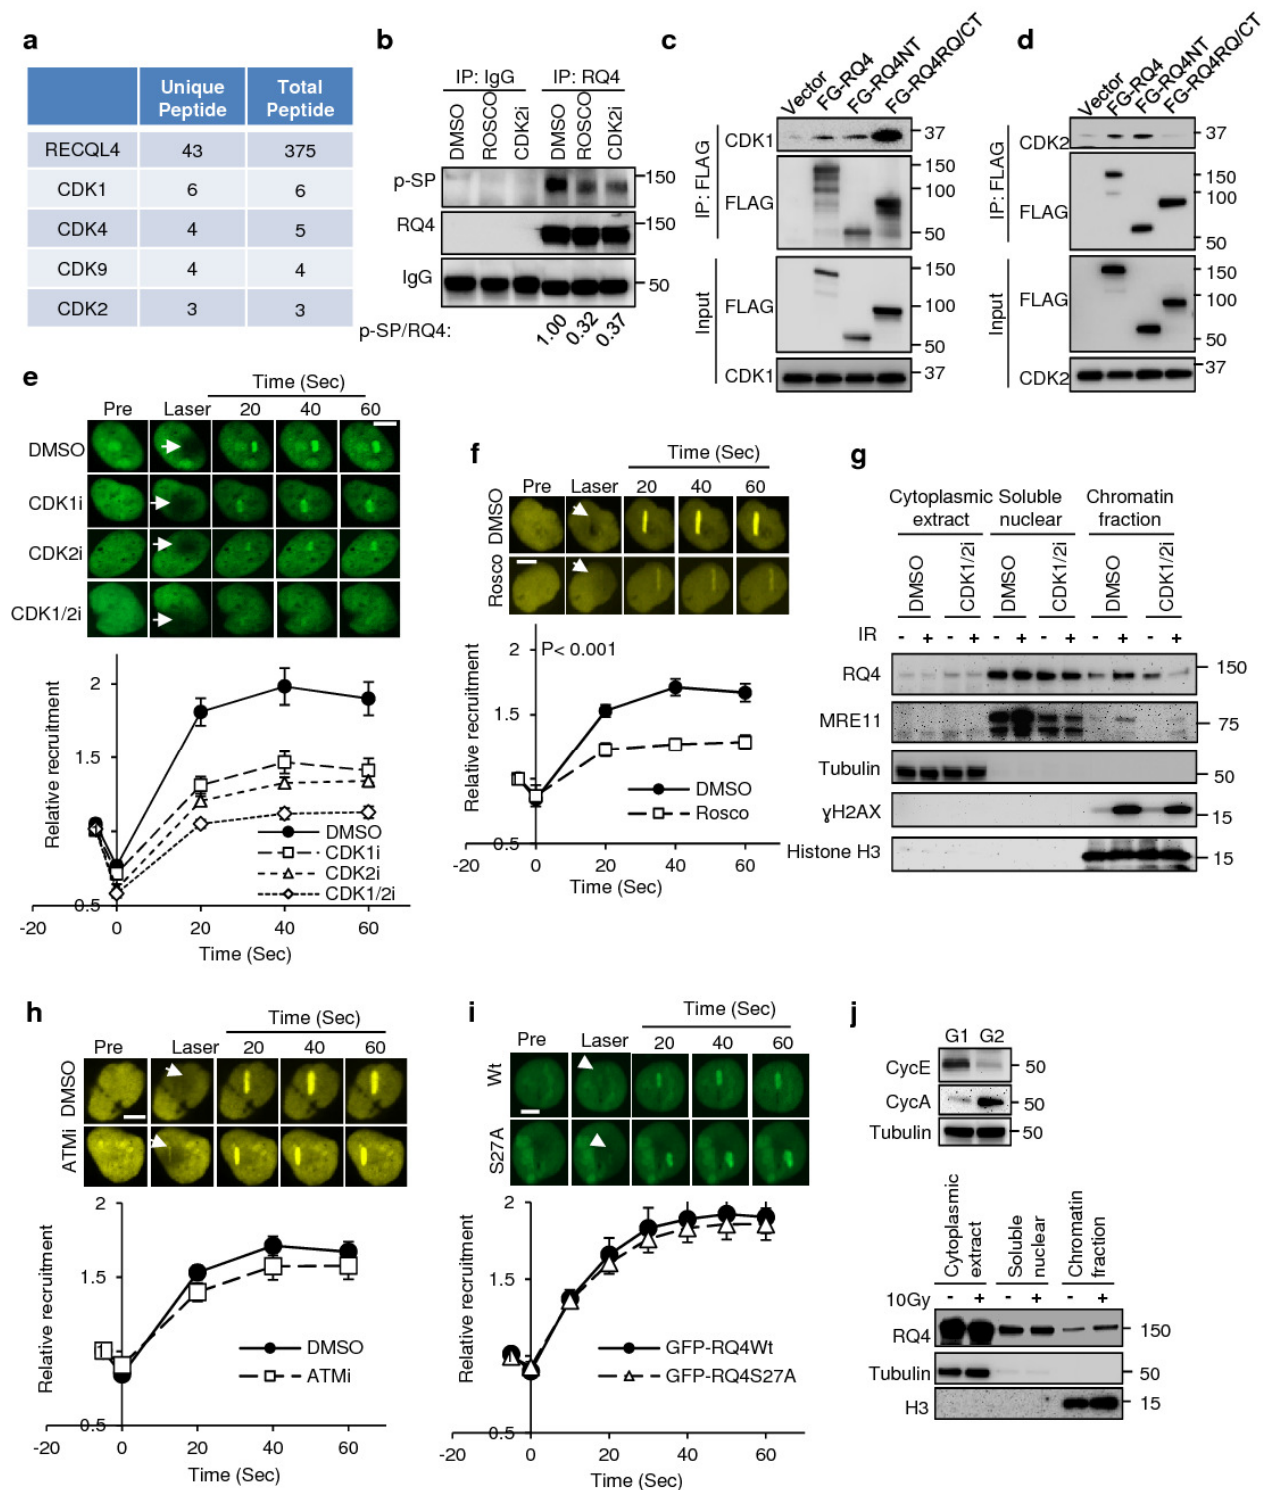

**Supplementary Figure 3** CDK-mediated phosphorylation promotes RECQL4 recruitment to DSBs. **(a)** RECQL4-interacting CDKs were identified by mass spectrometry. GFP-tagged RECQL4 was immunoprecipitated from HEK293T cells with its interacting partners and subjected to mass spectrometry analysis. **(b)** Phosphorylation on SP motif of RECQL4 was repressed by CDK inhibitors. 20  $\mu$ M roscovitine (ROSCO) or 20  $\mu$ M CDK2i-II (CDK2i) were used for treated U2OS cells. **(c, d)** Mapping the interacting domains of RECQL4 with CDK1 **(c)** or CDK2 **(d)**. 3XFLAG-tagged RECQL4, RQ4NT (1-447AA) and RQ4RQ/CT (447-1208 AA) were purified from HEK293T cells with their interacting partners. CDK1 and CDK2 were detected with the related antibodies. **(e)**

Ser89/Ser251 phosphorylation promotes recruitment of RECQL4 to laser-induced DSBs. The relative intensities of the GFP signals are presented as mean  $\pm$  s.e.m. The number of cells were quantified, for RQ4Wt, n=40; RQ4-2A, n=58; RQ4-2D, n=26. Scale bar, 5  $\mu$ m. **(f)** Treatment with a pan-CDK inhibitor, Roscovitine, represses recruitment of YFP-RECQL4 to DSBs in HeLa cells. HeLa cells expressing YFP-RECQL4 were pretreated with DMSO or 20  $\mu$ M Roscovitine for 4 hrs, and then submitted for micro-point laser irradiation. Relative intensities of YFP-RECQL4 are shown as mean  $\pm$  s.e.m with p-values calculated by Student's t-test. Number of cells quantified: DMSO, n=17; Rosco, n=6. Scale bar, 5  $\mu$ m. **(g)** CDK1 and CDK2 inhibition decreased accumulation of RECQL4 and MRE11 on chromatin in U2OS cells after IR stress. U2OS cells were pretreated with 10  $\mu$ M RO3306 and 10  $\mu$ M CDK2i-III for 4 hrs before 10 Gy IR then subcellular fractions were prepared as described in Material and Methods. **(h)** Treatment of HeLa cells with the ATM selective inhibitor KU55933 does not significantly alter the recruitment of YFP-RECQL4 to DSBs. HeLa cells expressing YFP-RECQL4 were pretreated with DMSO or 20  $\mu$ M ATMi (KU55933) for 4 hrs and then subjected to micro-point laser irradiation. The relative intensities of YFP-RECQL4 are shown as mean  $\pm$  s.e.m. The number of cells analyzed were: DMSO, n=16; ATMi, n=8. **(i)** Substitution of Ser27 to alanine does not alter recruitment of RECQL4 to DSBs. GFP-tagged RECQL4 and RQ4S27A were expressed in U2OS cells, and real-time recruitment was observed and quantified. The relative intensities of GFP-RECQL4 and GFP-RQ4S27A are shown as mean  $\pm$  s.e.m. The number of cells quantified: RQ4Wt, n=17; for RQ4S27A, n=24. Scale bar, 5  $\mu$ m. **(j)** FLAG-RECQL4-2D is recruited to chromatin after IR stress in G1 U2OS cells. U2OS cells with endogenous RECQL4 depleted were transfected with 3XFLAG-RECQL4-2D, and synchronized with aphidicolin. Then subcellular fractions were prepared from the G1 cells with IR or without IR.

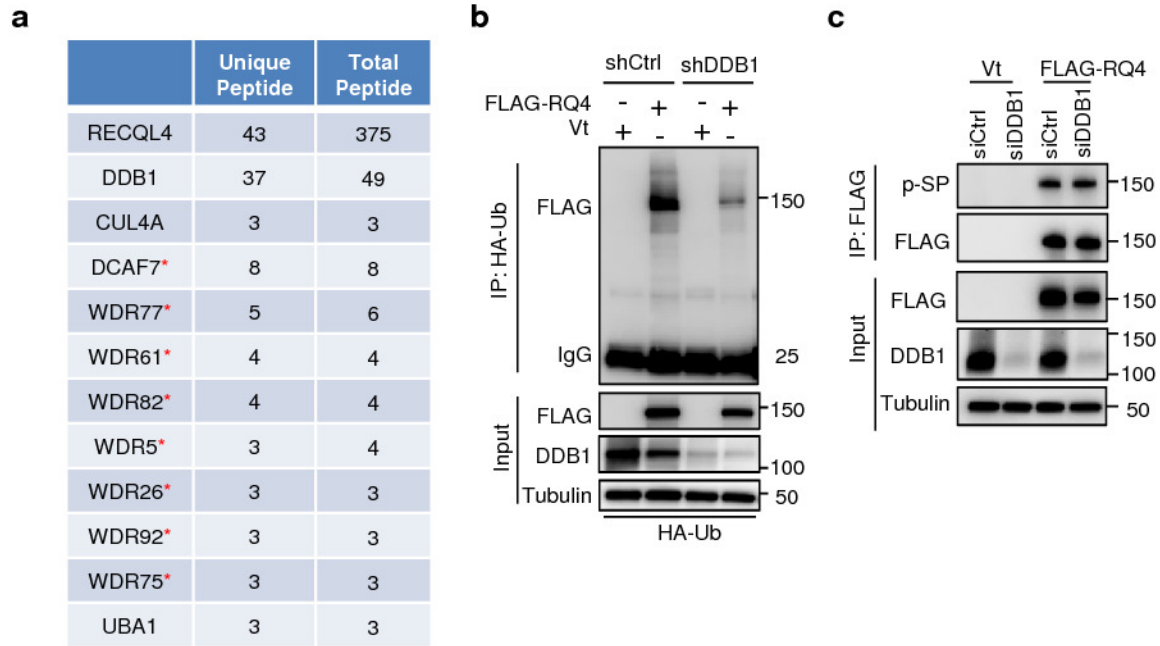

**Supplementary Figure 4** The DDB1-CUL4A E3 ubiquitin ligase interacts with RECQL4 and ubiquitinates it in HEK293T cells. **(a)** Identification of DDB1, CUL4A and WD40-containing proteins (labeled with asterisks) in GFP-RECQL4 IP product from HEK293T cells by mass spectrometry. **(b)** Depletion of DDB1 reduces ubiquitination of RECQL4 in HEK293T cells. The plasmids expressing HA-tagged ubiquitin, 3XFLAG-tagged RECQL4 or vector were co-transfected into DDB1-depleted or control cells, and ubiquitinated proteins were immunoprecipitated by HA-IP. Ubiquitinated 3XFLAG-RECQL4 was detected with anti-FLAG antibody by Western blotting. **(c)** Depletion of DDB1 does not alter phosphorylation of SP sites in RECQL4 in HEK293T cells. 3XFLAG-RECQL4 was isolated from DDB1-depleted and control cells and analyzed by Western blotting with anti-p-SP antibody.

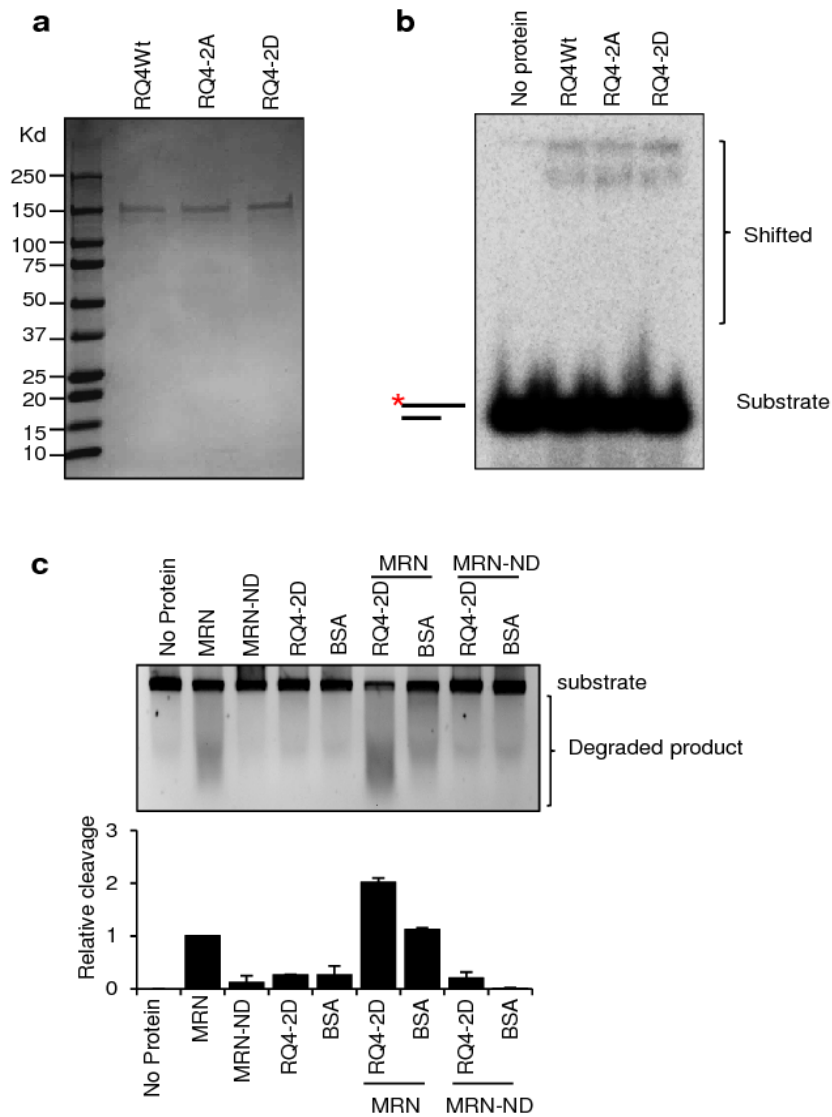

**Supplementary Figure 5** Phosphorylation on Ser89/Ser251 does not affect stimulation of RECQL4 on nuclease activity of MRN. **(a)** Coomassie blue stained protein gel with purified 3XFLAG-tagged RQ4Wt, RQ4-2A and RQ4-2D. The plasmids expressing 3XFLAG-tagged RQ4Wt, RQ4-2A or RQ4-2D were transfected into HEK293T cells, and the proteins were purified 24 hrs later in the presence of phosphatase and protease inhibitor. For each sample, 1  $\mu$ g of protein was loaded onto the SDS-PAGE gel and the purity of the purified proteins was visualized by Coomassie blue staining. **(b)** Analysis of DNA binding activity of RQ4Wt, RQ4-2A and RQ4-2D on the duplex DNA with 3' ssDNA overhang by gel shift mobility assay. 50 nM RECQL4 protein was applied. **(c)** Nuclease activity of MRN was stimulated by both RECQL4-2D in vitro. 20 nM MRN was mixed with 20 nM phosphor-mimetic mutant RQ4-2D in nuclease reaction buffer containing 100 ng closed circle phix174 ssDNA.

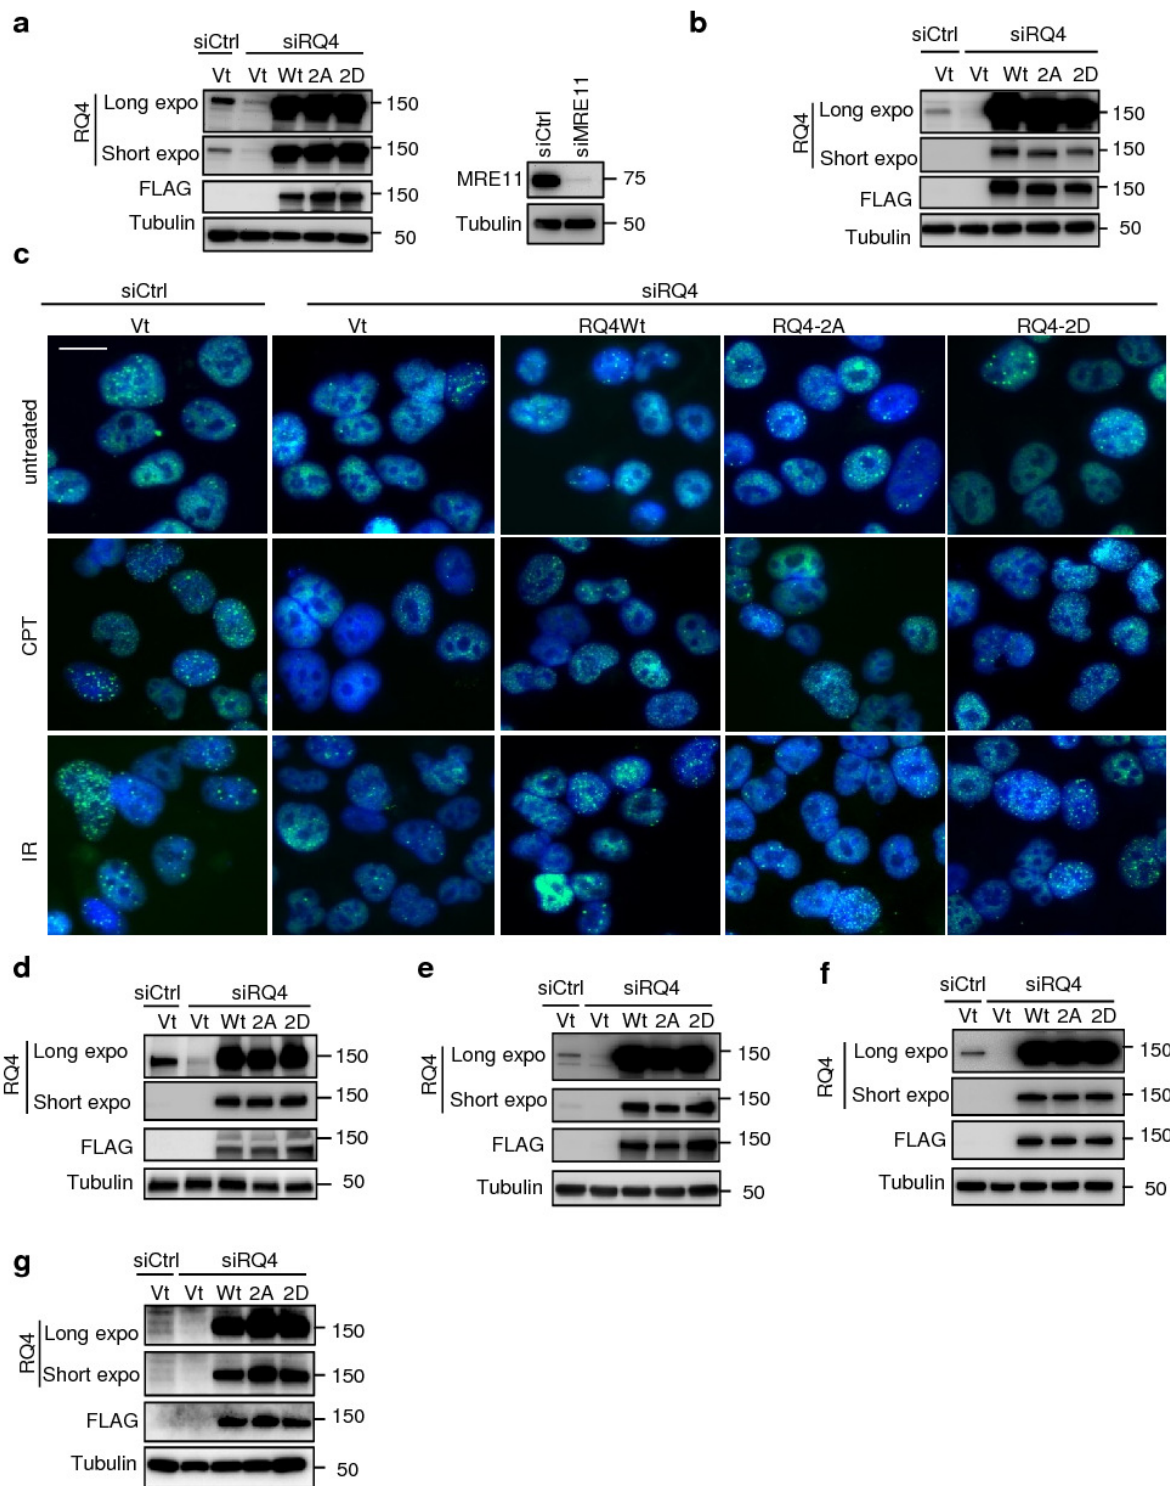

**Supplementary Figure 6** Western blotting analysis of protein levels of endogenous RECQL4 and 3XFLAG-tagged RECQL4 WT or mutants: **(a)** in AID-DivA U2OS cells used for DNA end resection assay and **(b)** U2OS cells used for RPA foci analysis. Representative images of RPA foci in U2OS cells after IR or CPT treatment are showed in **(c)**. Scale bar, 20  $\mu$ m. Western blotting analysis of protein levels in: **(d)** DR-GFP U2OS cells used for HR assay, **(e)** EJ5 U2OS used for NHEJ assay, **(f)** U2OS cells used for cell survival analysis, and **(g)** human fibroblasts used for SA- $\beta$ -gal staining.



# Supplementary Figure 7

**Fig. 1a**

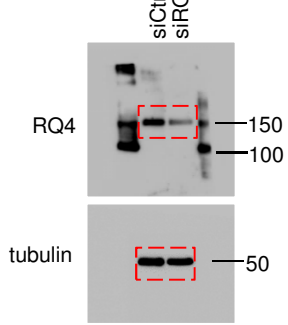

**Fig. 1b**

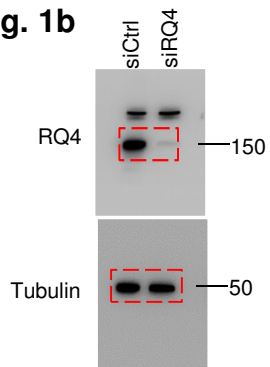

**Fig. 1f**

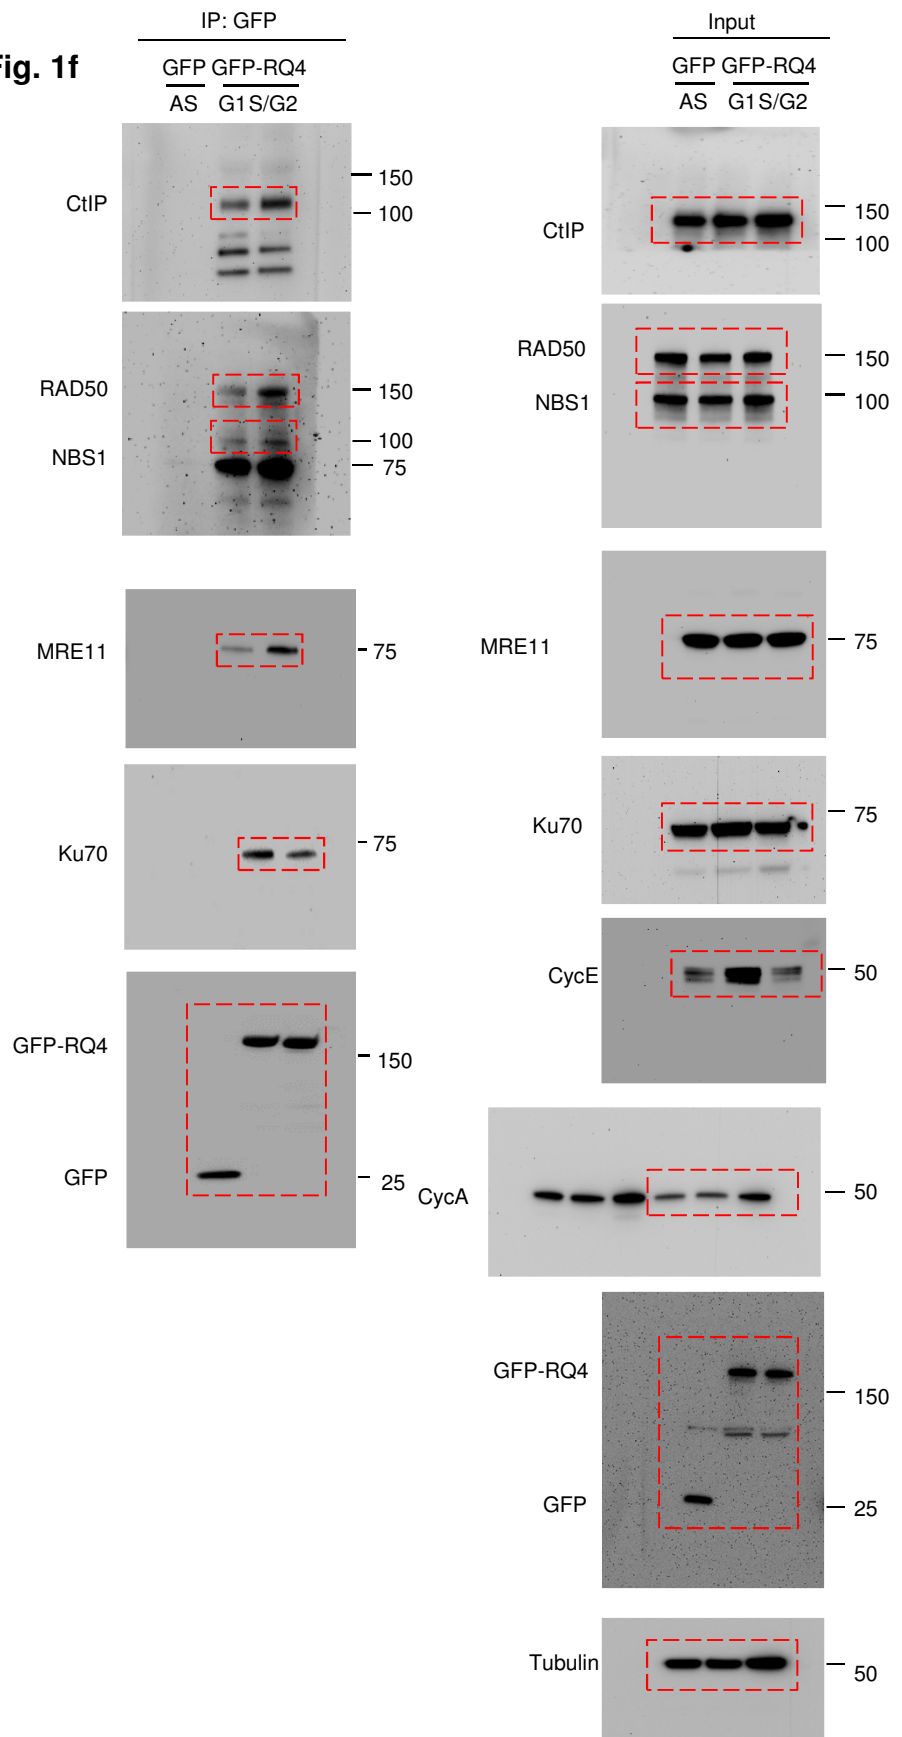

**Supplementary Figure 7**

**Fig. 2a**

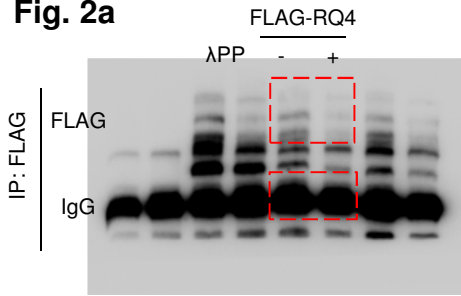

**Fig. 2b**

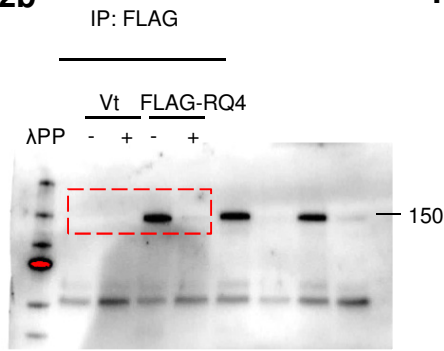

**Fig. 2d**

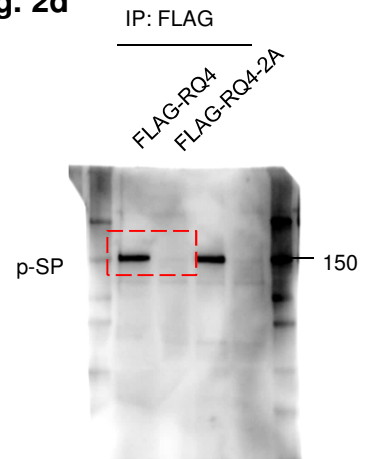

**Fig. 2e**

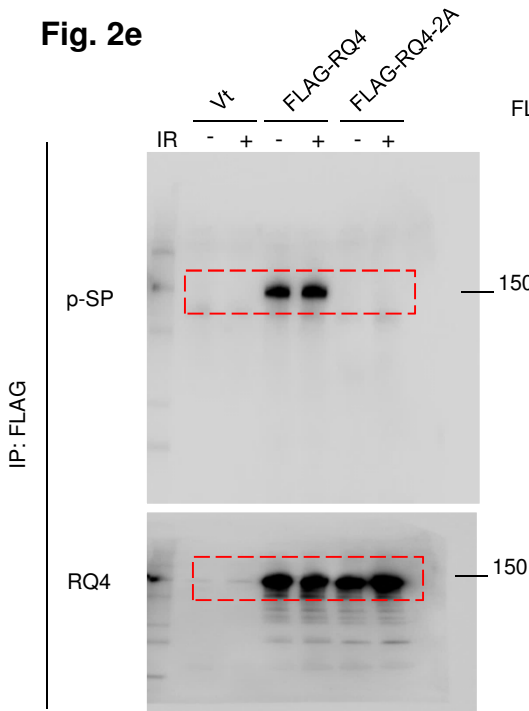

**Fig. 2f**

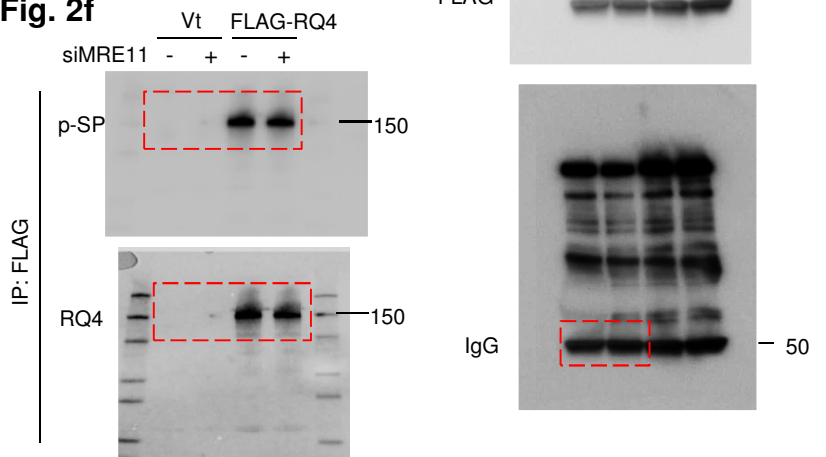

**Fig. 2g**

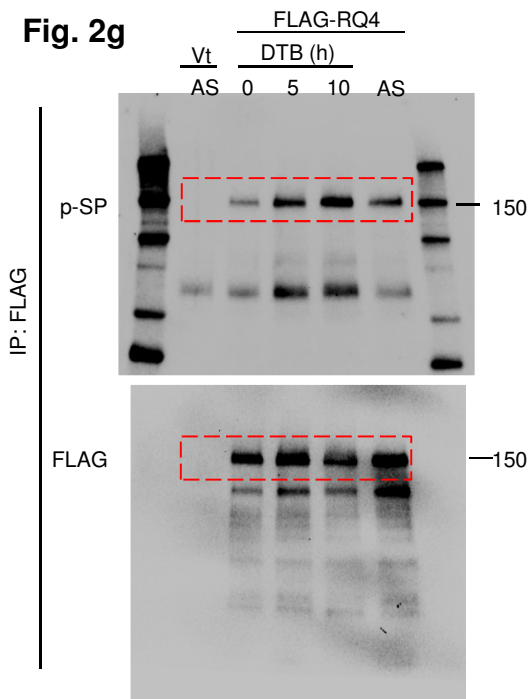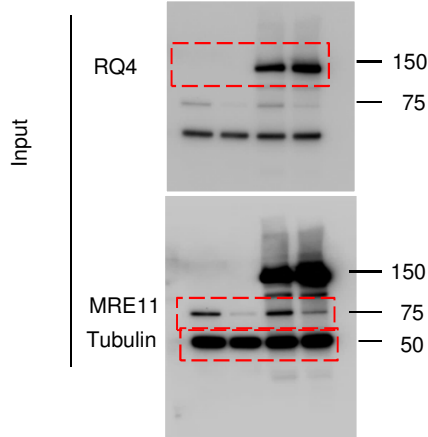

## Supplementary Figure 7

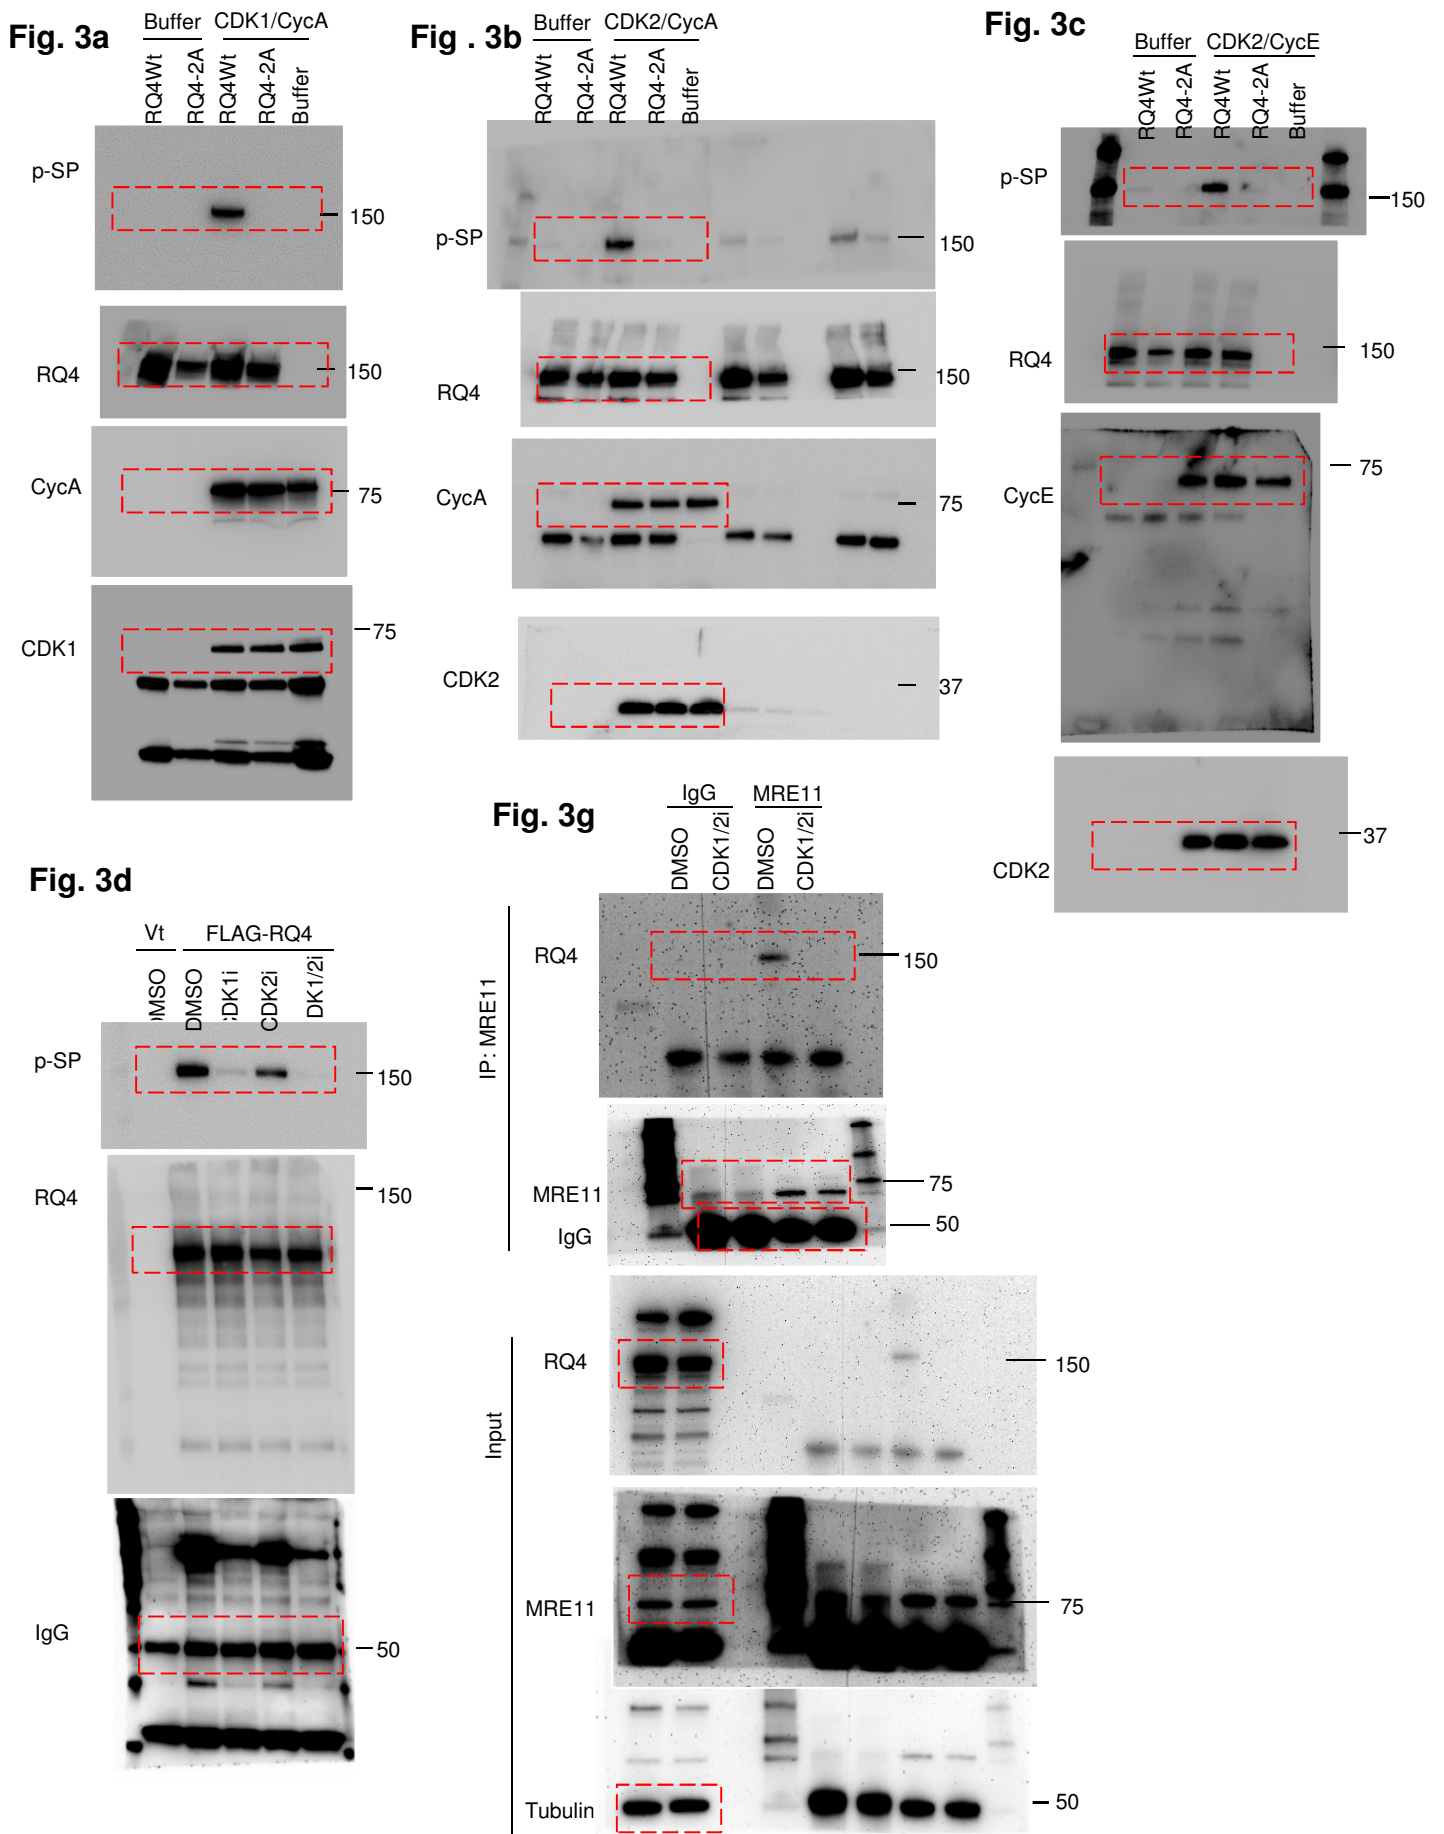

# Supplementary Figure 7

## Fig. 3f

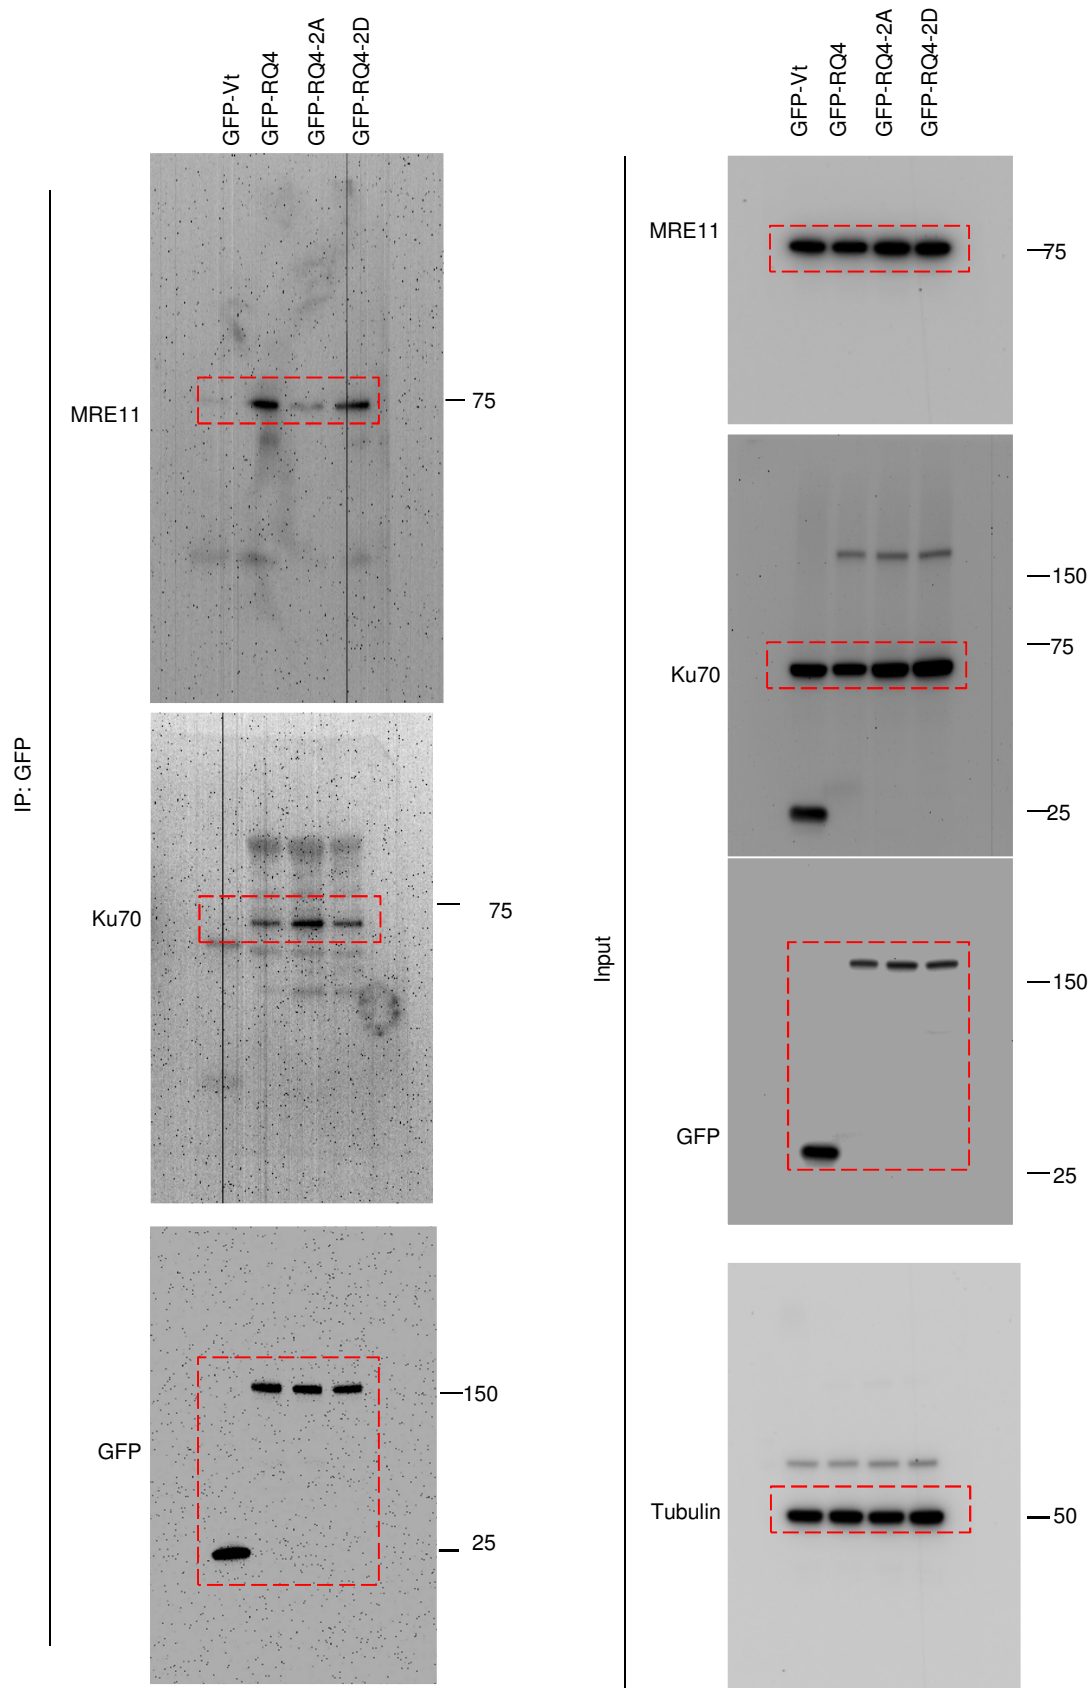

**Supplementary Figure 7**

**Fig. 4a**

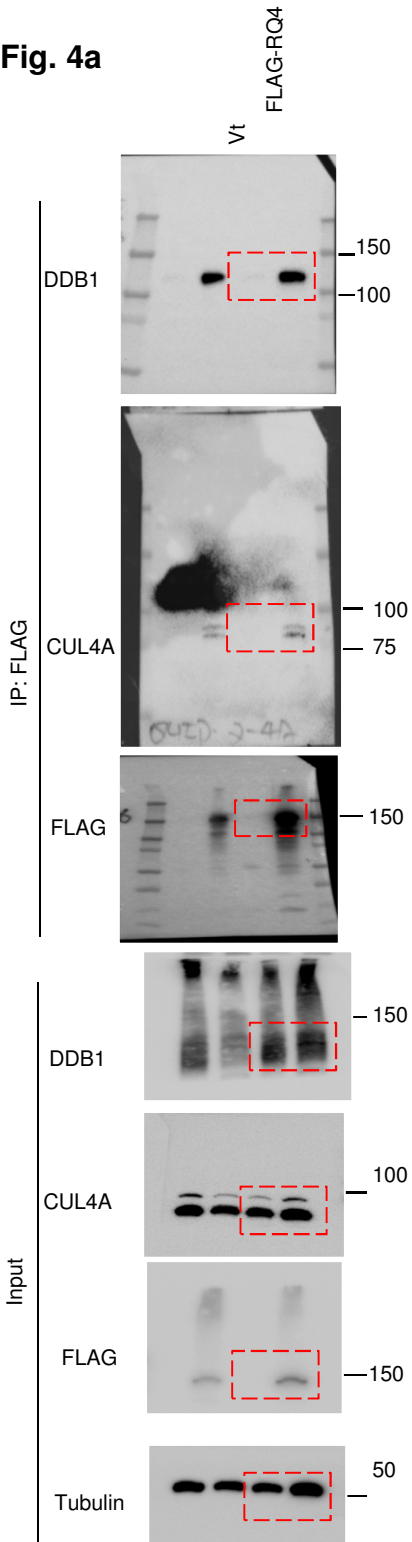

**Fig. 4b**

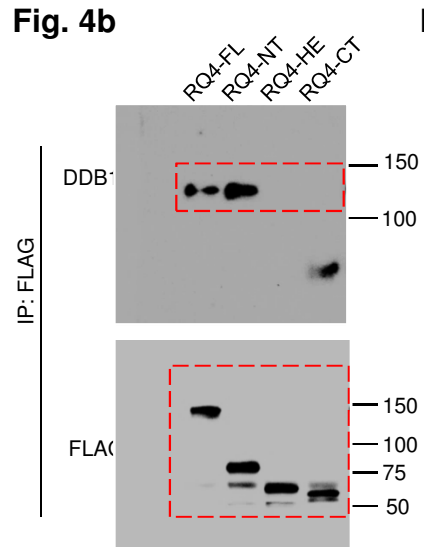

**Fig. 4d**

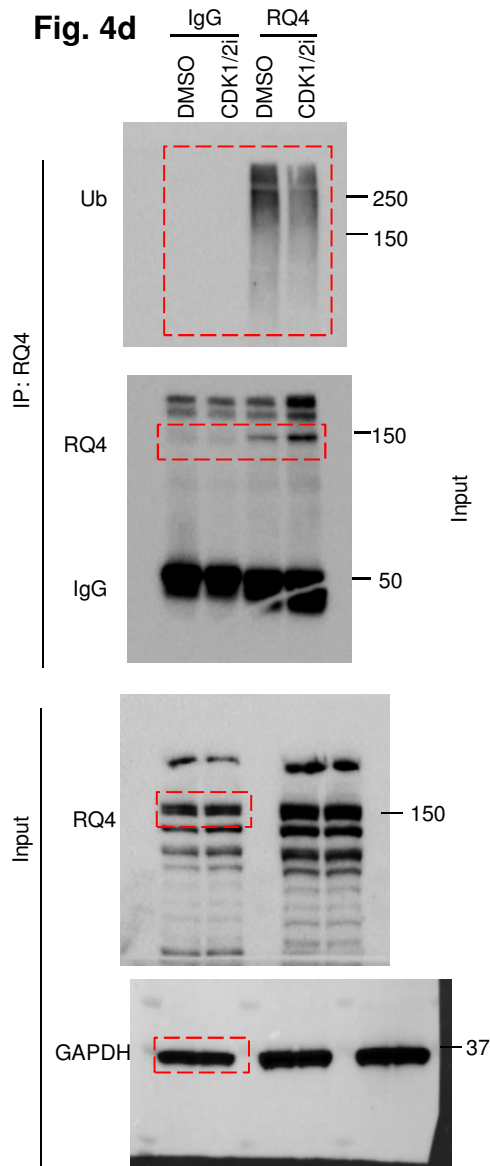

**Fig. 4c**

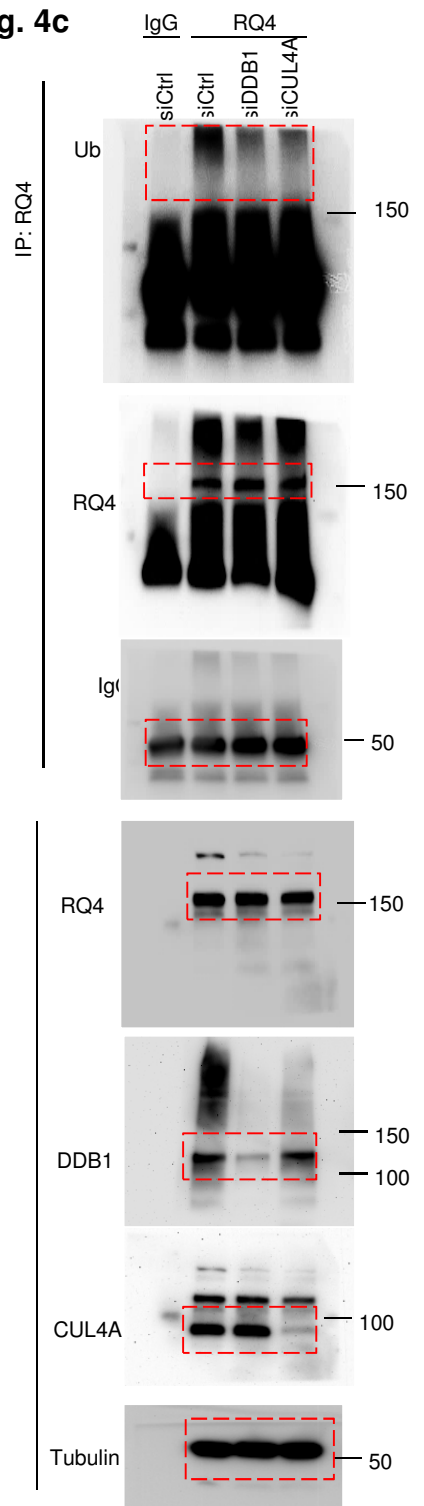

Supplementary Figure 7

Fig. 4e

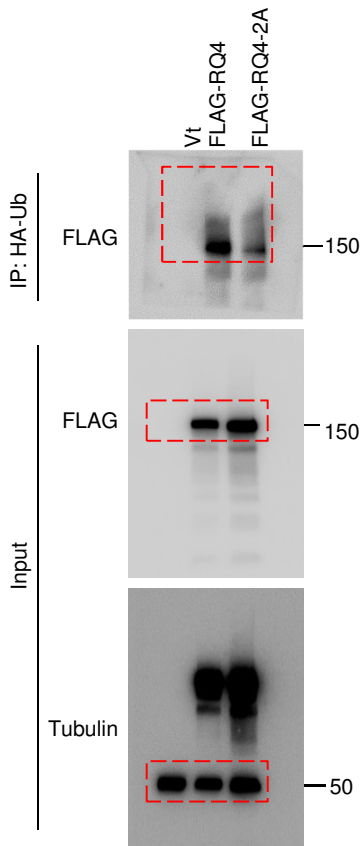

Fig. 4f

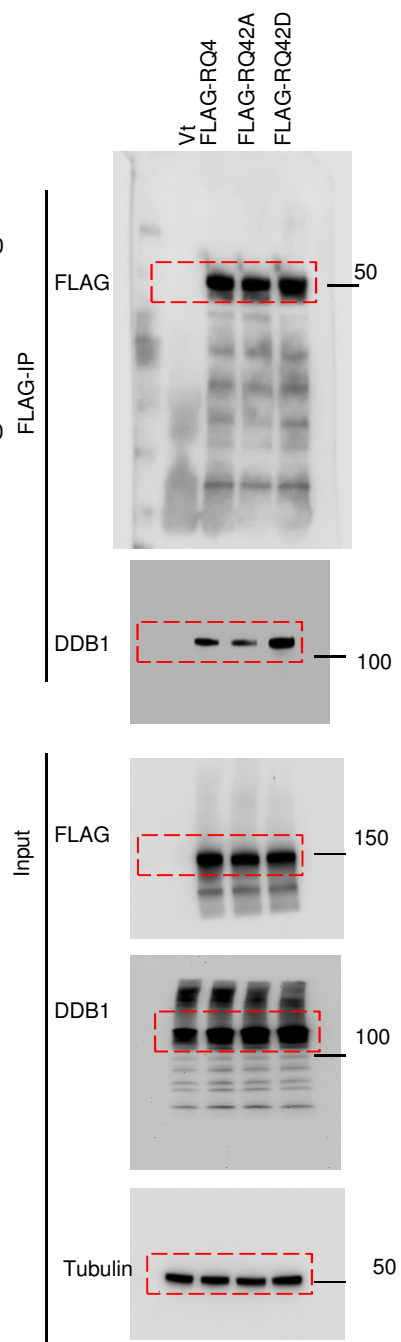

Fig. 4g

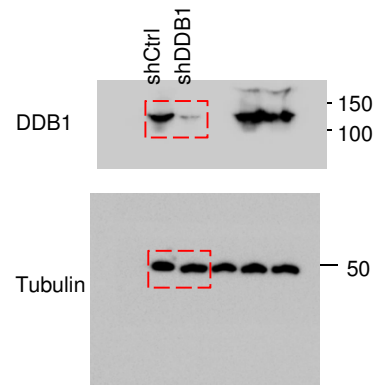

Fig. 4h

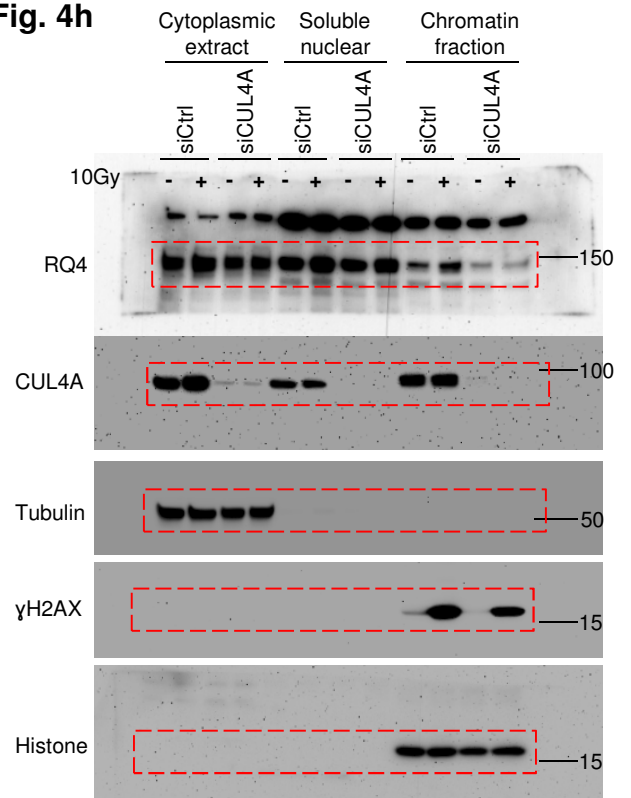

# Supplementary Figure 7

## Fig. S2b

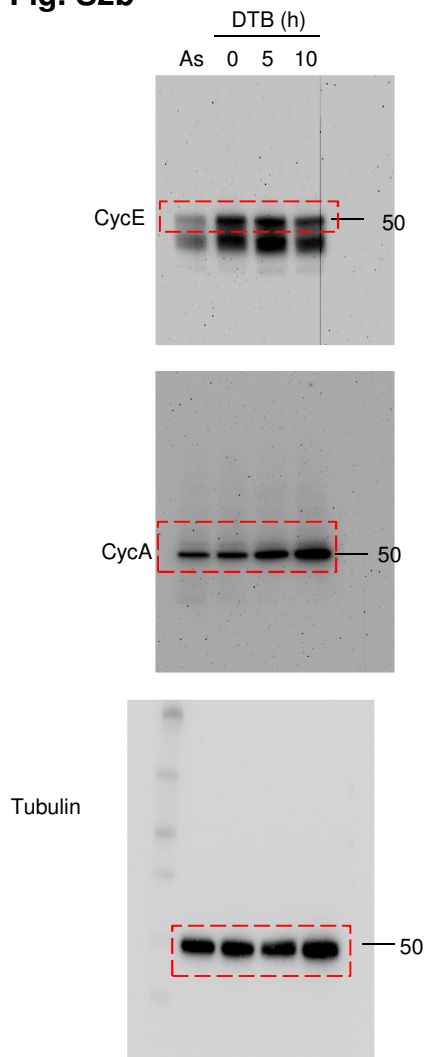

## Fig. S2d

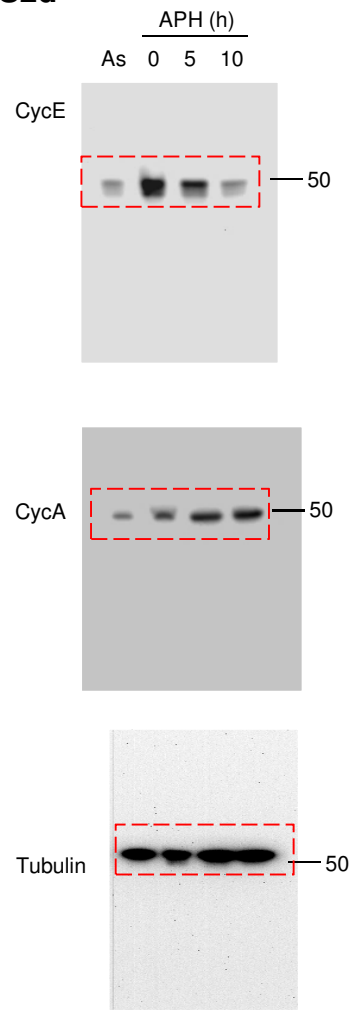

## Fig. S2e

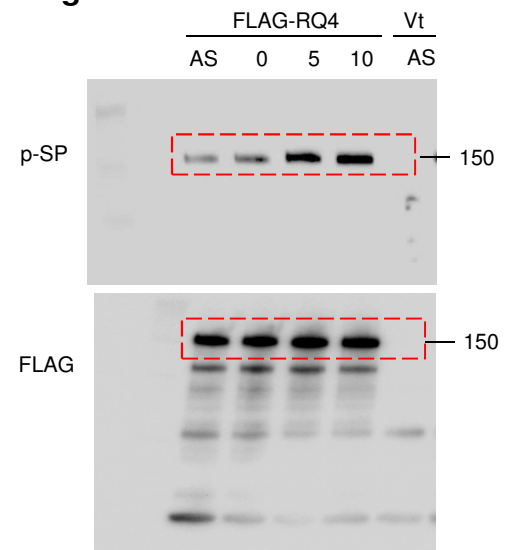

## Supplementary Figure 7

**Fig. S3b**

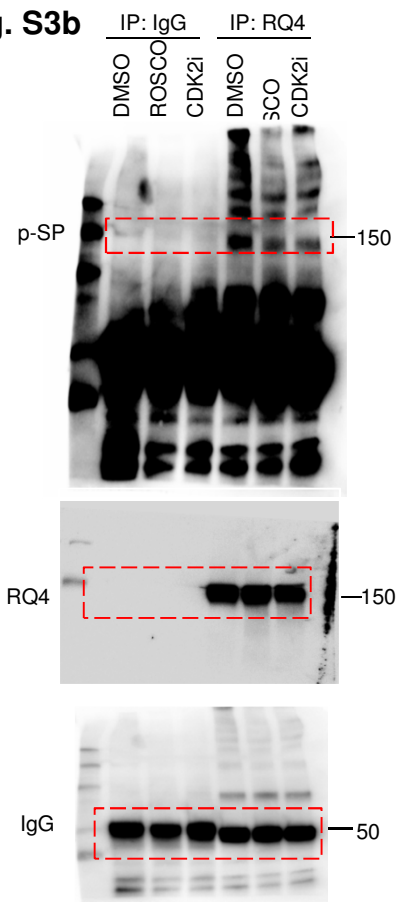

**Fig. S3c**

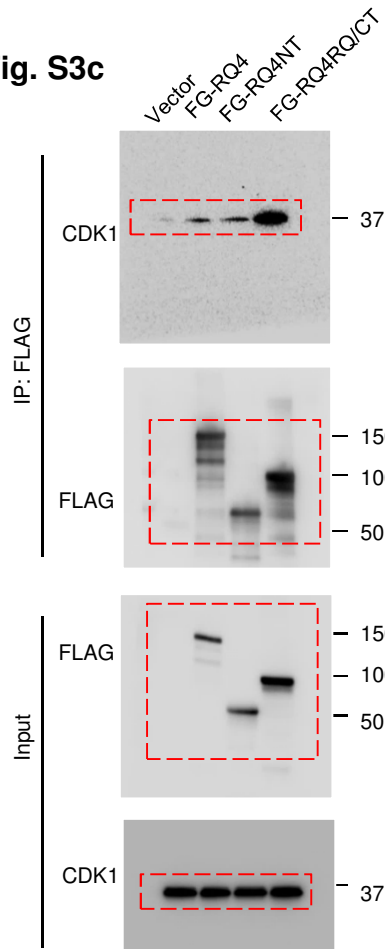

**Fig. S3d**

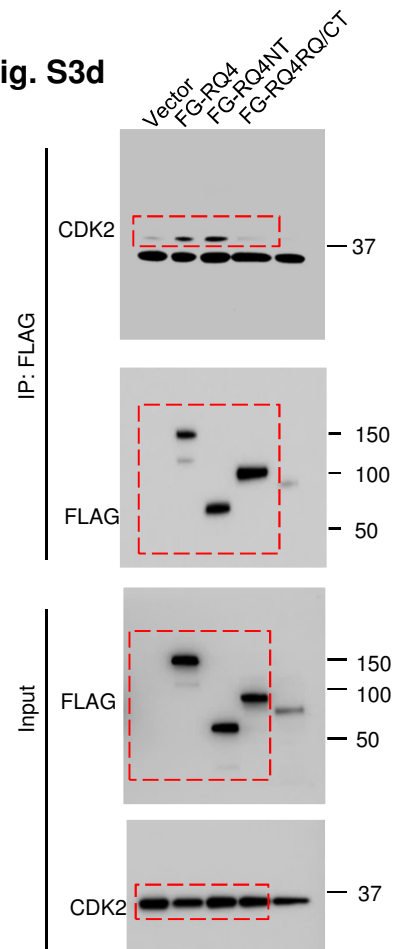

**Fig. S3g**

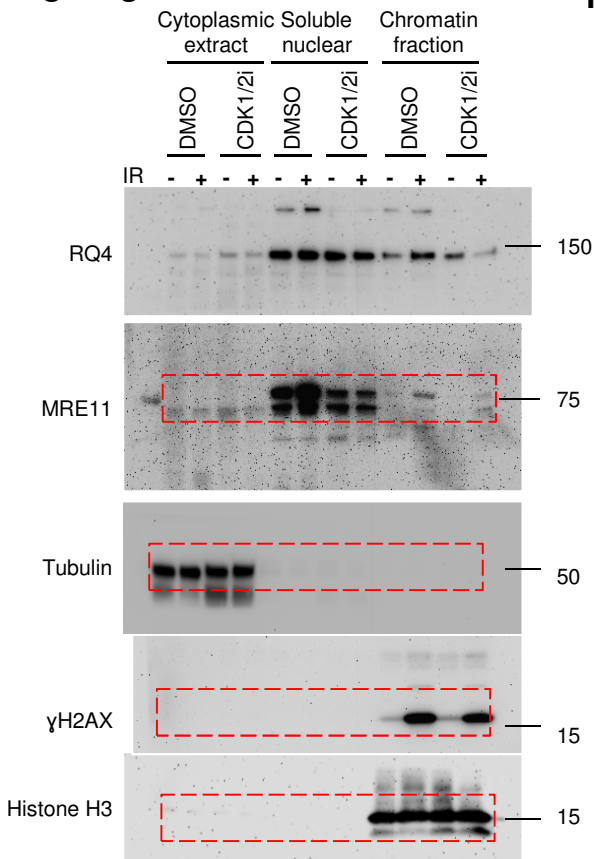

**Fig. S3j**

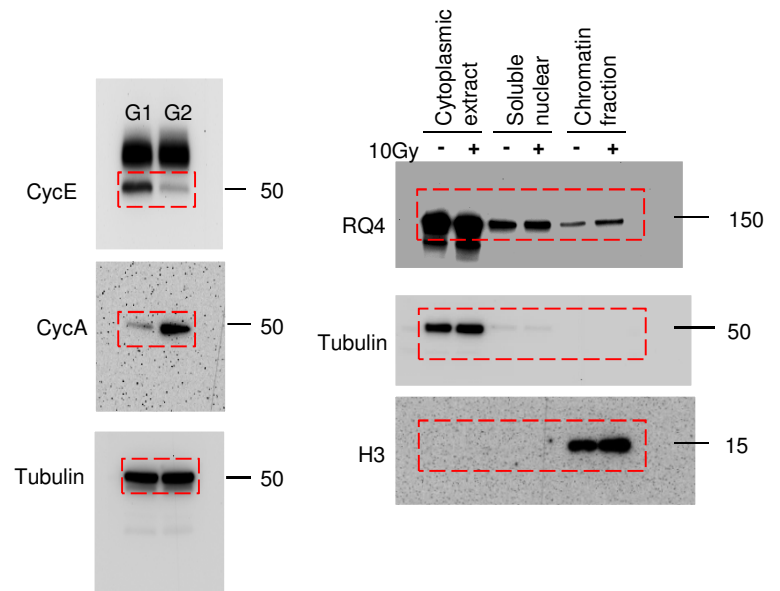



# Supplementary Figure 7

## Fig. S4b

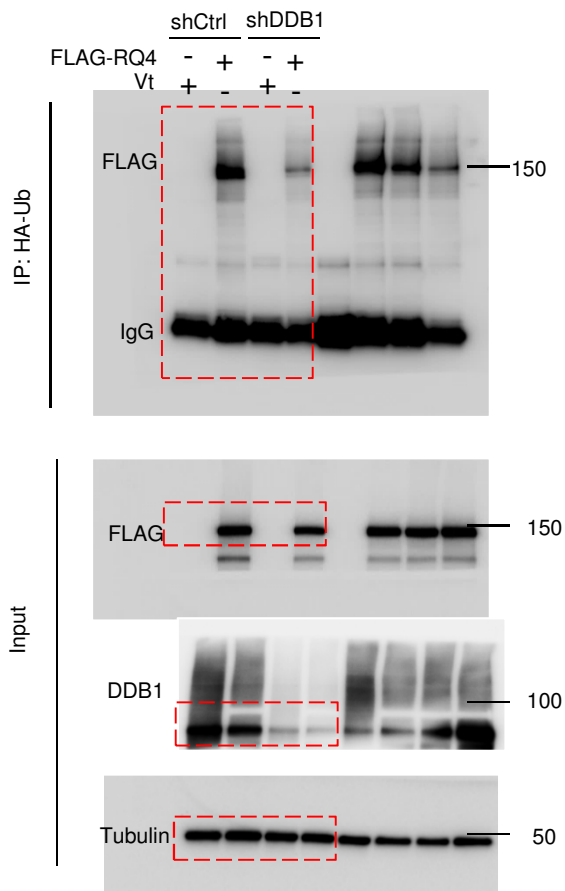

## Fig. S4c

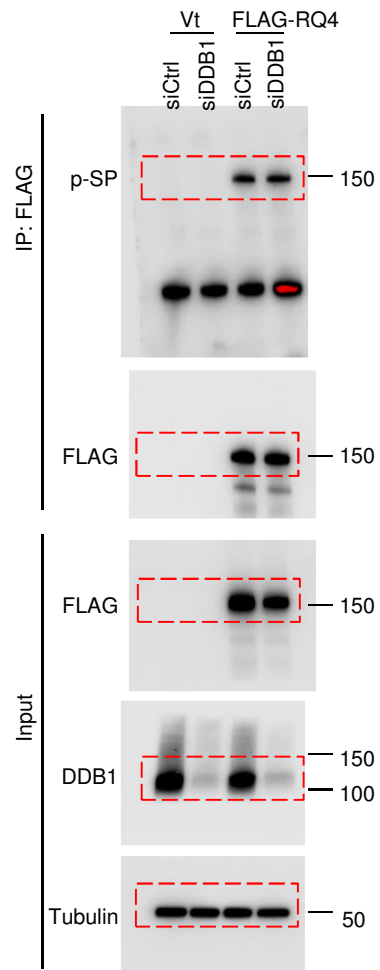

## Supplementary Figure 7

**Fig. S6a**

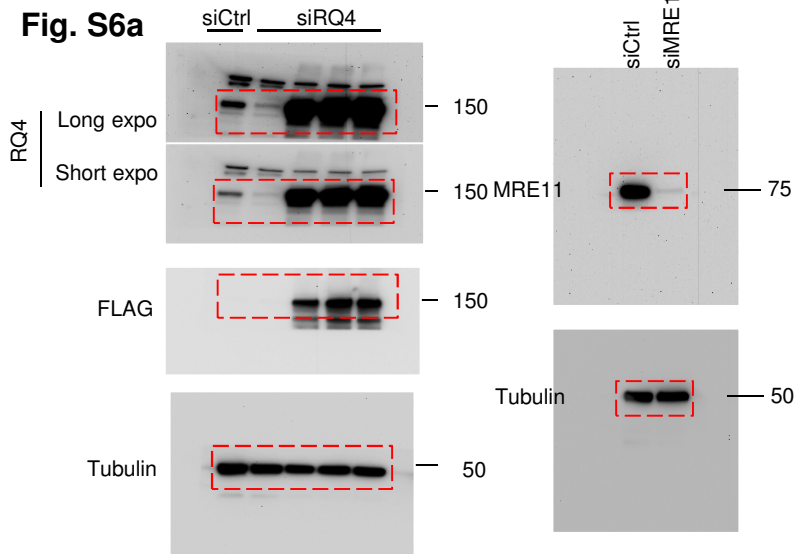

**Fig. S6b**

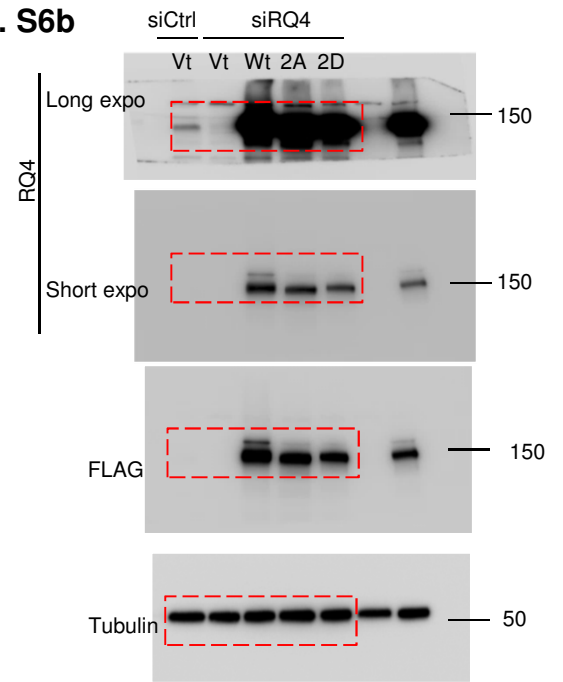

**Fig. S6d**

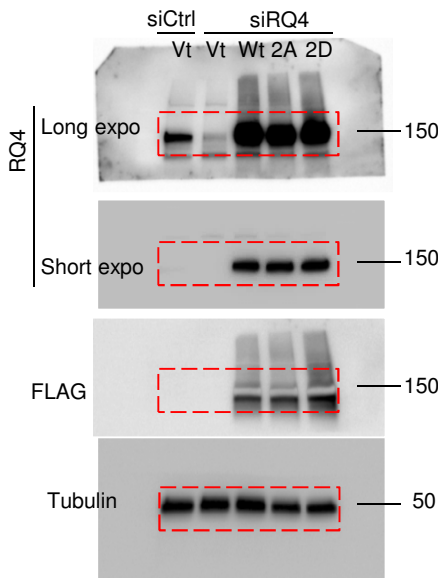

**Fig. S6e**

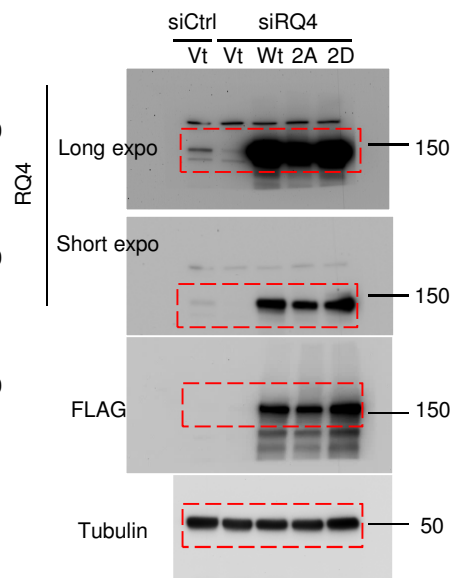

**Fig. S6f**

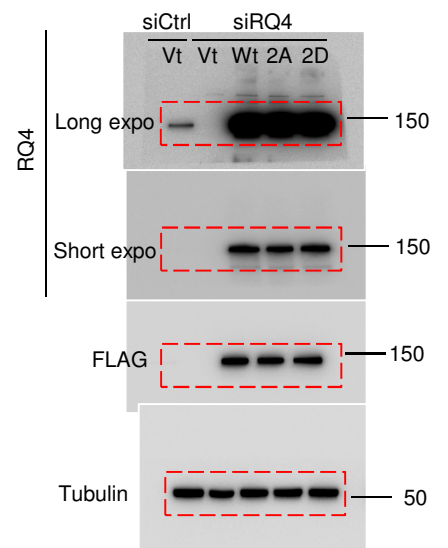

**Fig. S6g**

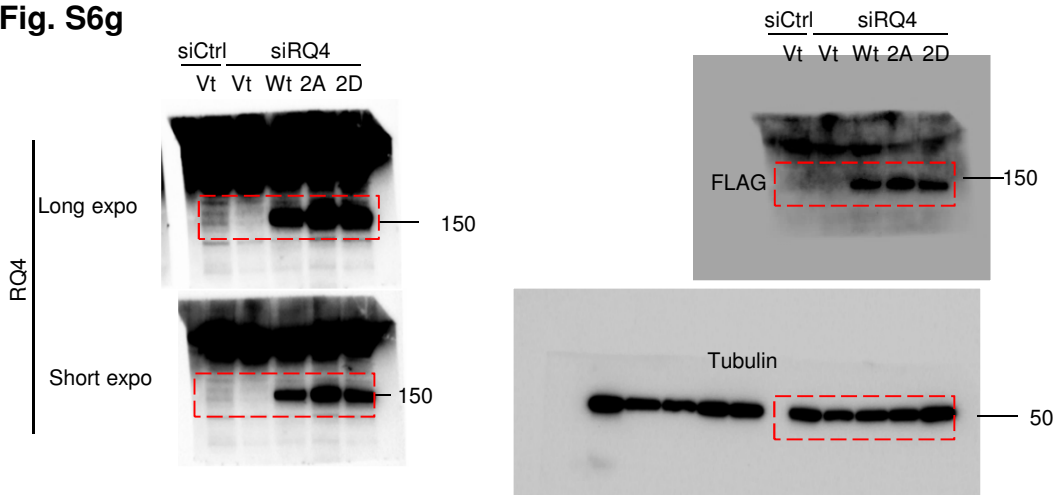

Supplement: 41467_2017_2146_MOESM1_ESM.pdf [file 41467_2017_2146_MOESM1_ESM.pdf]
